# Supplementary material for: A cobalt-based bifunctional metal organic framework-mediated fluorescent bio-sensing system for the hypersensitive detection of Ag+ ions through catalytic hairpin assembly
Source: Royal Society of Chemistry journal article supplement (doi:10.1039/d2nj02622h), 2022-01-01
Supplement: d2nj02622h1.pdf [file d2nj02622h1.pdf]

## Cobalt based Bi-functional Metal Organic Framework mediated Fluorescent Bio-sensing System for Hypersensitive Detection of Ag<sup>+</sup> Ions through Catalytic Hairpin Assembly

Rajaji Pavadai, Arunjegan Amalraj and Panneerselvam Perumal\*

Department of Chemistry, SRM Institute of Science and Technology, Kattankulathur, 603 203,  
Tamil Nadu, India.

**Table S1.** Comparisons of proposed sensing probe with other reported probe for Ag<sup>+</sup>

| Sensing Probe                                 | Signal | LoD     | Linear range  | Water Samples       | Ref       |
|-----------------------------------------------|--------|---------|---------------|---------------------|-----------|
| AuNPs-DNA                                     | FS     | 9.5 nM  | 50-750 nM     | -                   | 1         |
| PDA-co-SiO <sub>2</sub> NPs/DNA               | FS     | 1 nM    | 0-1 nM        | -                   | 2         |
| MnO <sub>2</sub> /DNA                         | FS     | 9.1 nM  | 30–240 nM     | Tap and Lake        | 3         |
| WS <sub>2</sub> Nanosheets                    | FS     | 1.2 nM  | 5.0–1000.0 nM | Tap                 | 4         |
| DNAzyme/MnCoPBAs -PDANCs                      | FS     | 4.2 nM  | 4-20 nM       | Tap and Lake        | 5         |
| DNAzyme/Trimetallic-MOF                       | FS     | 0.29 nM | 50-500 nM     | Tap and Lake        | 6         |
| 3D MOF-MoS <sub>2</sub> NBs/Y-shaped DNAzyme  | FS     | 0.25 nM | 0-3.0 nM      | Tap and Lake        | 7         |
| Co-BFMOF/FAM-HAPs/helper aptamer (CHA system) | FS     | 45 pM   | 0-0.8 nM      | Tap, Lake and River | This Work |

detection.

FS-Fluorescence Signal

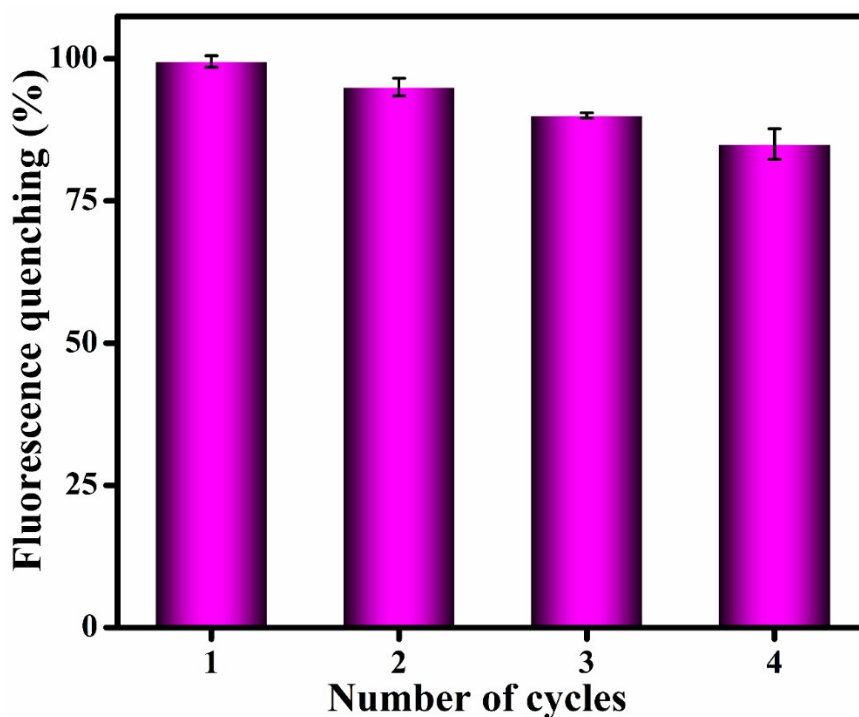

**Figure S1.** Recycling efficiency of Co-BFMOF

#### REFERENCE

1. G. Wang, S. Wang, C. Yan, G. Bai, Y. Liu, *Colloids and Surfaces B: Biointerfaces*, 2018, 167, 150-155.
2. S. Yang, M. Liu, F. Deng, L. Mao, Y. Yuan, H. Huang, J. Chen, L. Liu, X. Zhang, Y. Wei, *Applied Surface Science*, 2020, 510, 45421.
3. L. Qi, Z. Yan, Y. Huo, X. M. Hai, Z. Q. Zhang, *Biosensors and Bioelectronics*, 2017, 87, 566-571.
4. X. Zuo, H. Zhang, Q. Zhu, W. Wang, J. Feng, X. Chen, *Biosensors and Bioelectronics*, 2016, 85, 464-470.
5. P. Rajaji, P. Panneerselvam, *ACS omega*, 2020, 5, 25188-25198.
6. R. Pavadai, P. Perumal, *Journal of Photochemistry and Photobiology A: Chemistry*, 2022, 429, 113901.
7. R. Pavadai, A. Amalraj, S. Subramanian, P. Perumal, *ACS Applied Materials & Interfaces*, 2021, 13, 31710-31724.
